# Supplementary material
Source: publisher figshare collection journal article supplement (https://frontiersin.figshare.com/ndownloader/files/32584379)
Supplement: Supplementary file [file 32584379]

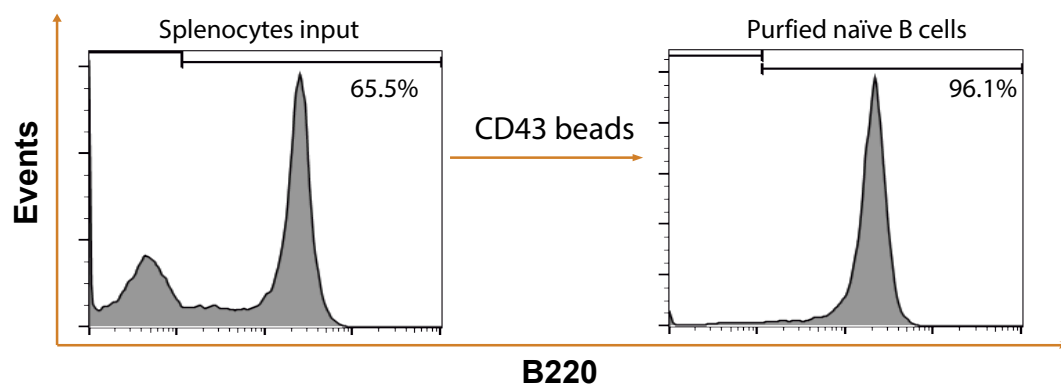

Supplementary figure 1. Magnetic beads B cell purification. Dynabeads CD43<sup>+</sup> untouched B cells kit was used. Purification was measured by FACS using B220 B cell marker.
